# Supplementary material
Source: PubMed Central journal article supplement (PMC3127883)
Supplement: 1105852108_pnas.201105852SI.pdf [file 1105852108_pnas.201105852SI.pdf]

# Supporting Information

Harper et al. 10.1073/pnas.1105852108

## SI Materials and Methods

**Immunohistochemistry, Multispectral Imaging Analysis, and X-Gal Staining.** Sections were dewaxed in HistoClear, rehydrated, and blocked in 1.5% hydrogen peroxide, boiled for 1 h in Tris-EDTA buffer (10 mM Tris base, 1 mM EDTA solution), blocked in 2% BSA/PBS solution before overnight incubation in primary antibody, washed, incubated in secondary antibody for 30 min (Envision kit; DAKO), developed via DAB, counterstained with hematoxylin (Vector Labs), dehydrated, and mounted in Cytoseal (Thermo Scientific). The following antibodies were used: Blimp1 (1:200; sc-130917; Santa Cruz), Ki67 (1:200; NCL-L-Ki67-MM1; NovoCastra), c-Myc (1:200; sc-764; Santa Cruz), Mucin-2 (1:100; sc-15334; Santa Cruz), and chromogranin (1:400; ab15160; Abcam). Alkaline phosphatase staining was carried out by using a kit from Vector Laboratories (SK-5100) per manufacturer instructions. For multispectral imaging analysis, sections were

incubated in secondary antibodies conjugated directly to quantum dots (Molecular Probes/Invitrogen) for 1 h, washed, dehydrated, and mounted. Images were taken by using a Nuance MSI camera (LOT; Oriel). X-gal staining was carried out as described (1).

**Western Blot Analysis.** E18.5 intestinal tissue was homogenized in radioimmunoprecipitation assay lysis buffer containing a mixture of protease inhibitors (Sigma). Proteins (50  $\mu$ g) were resolved on 8% SDS/PAGE gels, transferred to PVDF membranes (Millipore), blocked for 1 h in TBS with Tween-20 containing 7% nonfat dry milk, and sequentially probed with monoclonal rat anti-Blimp1 antibody (sc-130917; Santa Cruz), followed by ECL goat anti-rat IgG (Amersham). Blots were then stripped and reprobed with rabbit anti- $\beta$ -tubulin (sc-9104; Santa Cruz) to confirm equal protein loading.

1. Nagy A, Gertsenstein M, Vintersten K, Behringer R (2003) Manipulating The Mouse Embryo: A Laboratory Manual (Cold Spring Harbor Lab Press, Cold Spring Harbor, NY).

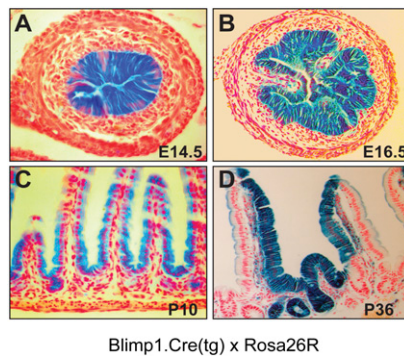

**Fig. S1.** Blimp1<sup>-</sup> adult crypt stem cells derive from Blimp1<sup>+</sup> fetal progenitors. (A) X-gal staining throughout *Blimp1.Cre(tg) x Rosa26R* primitive gut endoderm at E14.5. (B and C) The fetal epithelium remains positive in utero. (D) In adults, the entire crypt villous axis contains labeled progeny.

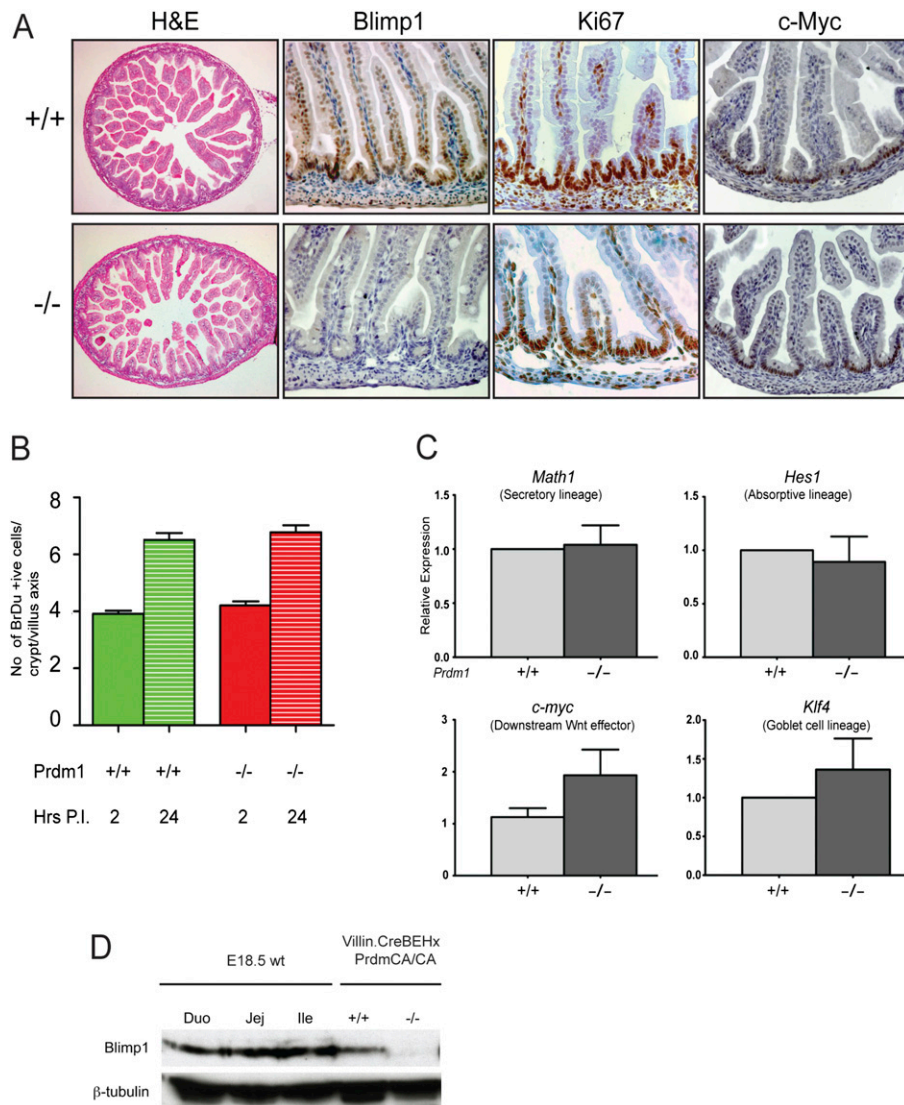

**Fig. 52.** Conditional inactivation eliminates Blimp1 expression but has no noticeable effect on terminally differentiated cell types or cell proliferation at E18.5. (A) H&E, Blimp1, Ki67, and c-Myc staining of WT and mutant proximal SI sections. (B) BrDU<sup>+</sup> cell counts at 2 or 24 h postinjection (P.I.) confirms equivalent rates of proliferation. (C) qPCR analysis of intestinal regulators revealed no significant differences between control and mutants ( $n > 8$  for both genotypes). (D) Western blot analysis of E18.5 WT intestine shows roughly equivalent Blimp1 expression levels in all segments, whereas conditional mutants lack expression. Blots were stripped and reprobed for  $\beta$ -tubulin to ensure equal protein loading.

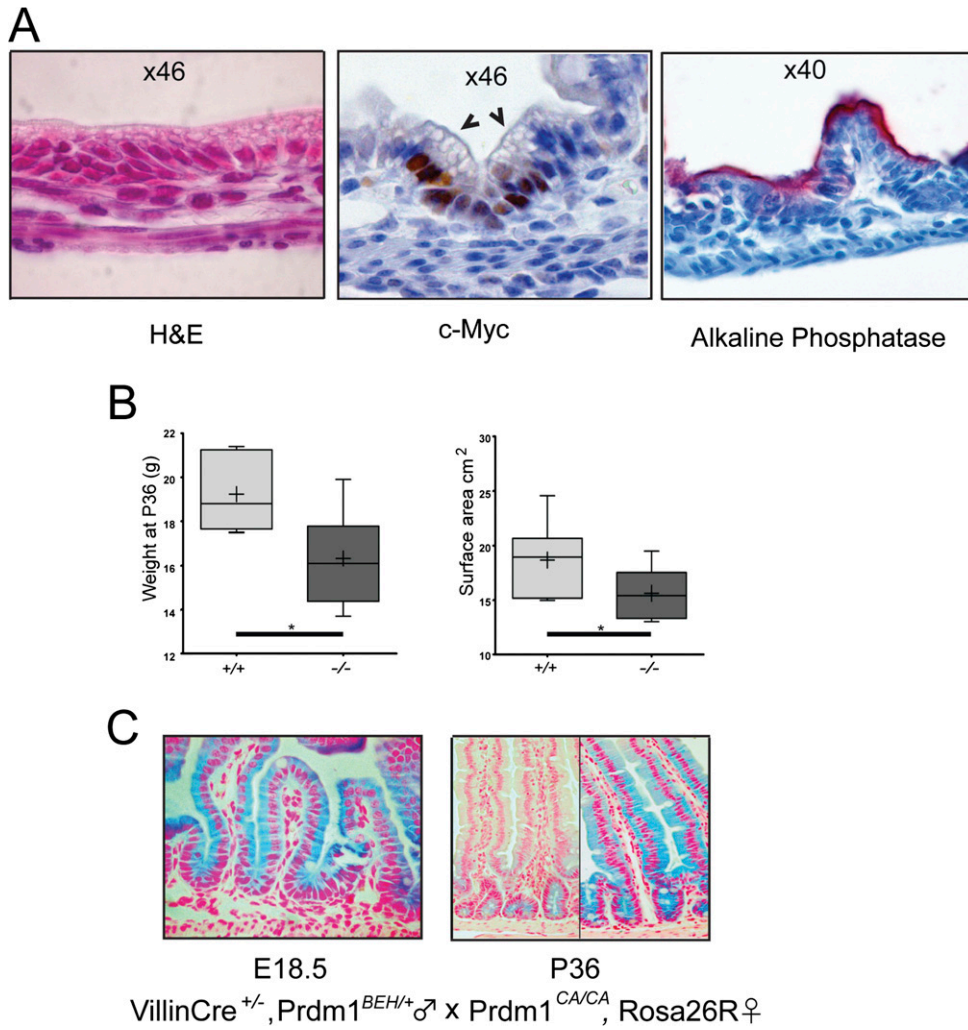

**Fig. S3.** Blimp1 loss causes fetal intestinal epithelial cells to acquire a terminal columnar phenotype, reduced villus density, and growth retardation. (A) H&E staining of mutant SI at P3 reveals the intervillous regions occupied by differentiated columnar epithelium. c-Myc<sup>+</sup> cells confined to the rare shallow crypts are columnar and highly vacuolated (arrows) and uniformly express alkaline phosphatase. (B) Survivors display decreased body weights and reduced SI surface area (box, interquartile range; horizontal line, median; vertical line, minimum to maximum values excluding outliers; cross, mean;  $n > 9$  for both genotypes). (C) Monitoring Villin.Cre-mediated deletion activity via X-gal staining shows the majority of the epithelium of the intestine and colon is deleted at E18.5. Survivors show areas of LacZ staining and nonstaining tissue suggesting transgene silencing or repopulation of neonatal epithelium by WT cells. As Blimp1 is not expressed in mature crypts, Villin.Cre-mediated deletion in adults has no physiological consequence.

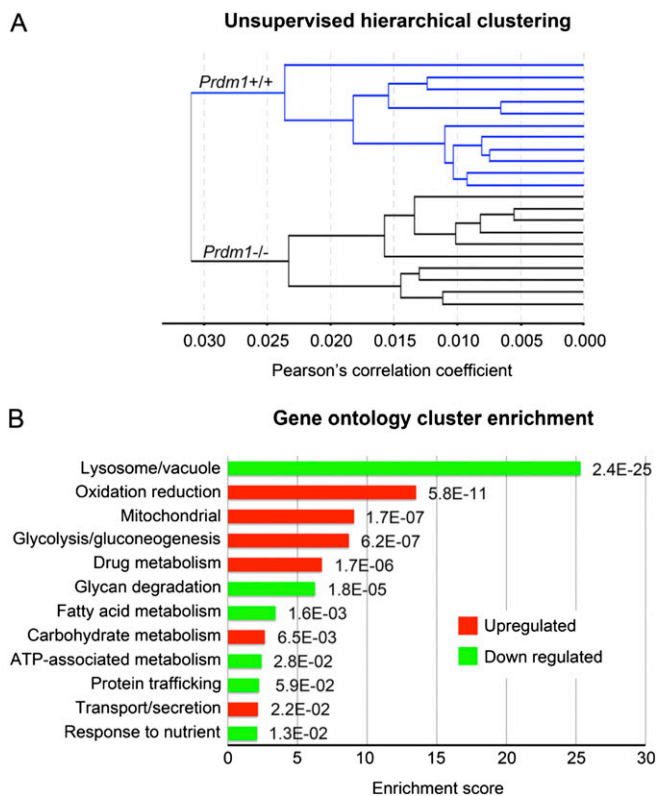

**Fig. S4.** Array data analysis. (A) Unsupervised hierarchical clustering of *Prdm1*<sup>+/+</sup> and *Prdm1*<sup>-/-</sup> SI array samples. Clear separation of *Prdm1* genotypes illustrates a high level of divergence between WT and mutant samples. (B) Functional annotation clustering analysis (DAVID 6.7) of up- and down-regulated genes from *Prdm1*<sup>-/-</sup> SI identifies enrichment of multiple gene clusters associated with energy metabolism, vacuole function, and molecular transport. The statistical significance of enrichment for each cluster is indicated by the *P* value indicated at the end of each bar on the graph.

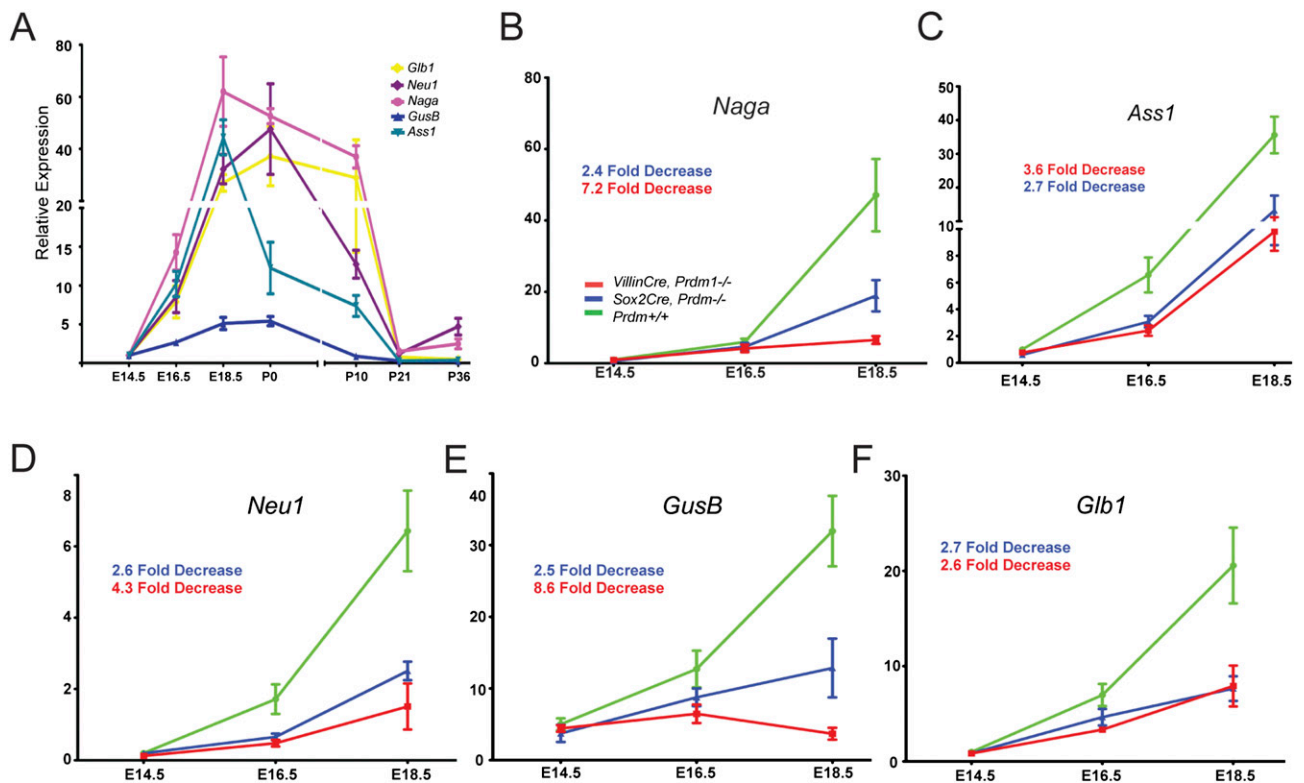

**Fig. 55.** Blimp1 loss compromises expression of immature enterocyte markers. (A) qPCR analysis of juvenile enterocyte markers. WT transcriptional profiles dramatically change between P10 and P21 as adult enterocytes repopulate the villus axis. (B–F) Expression of the immature markers *Naga*, *Ass1*, *Neu1*, *GusB*, and *Glb1*, is markedly reduced in mutant samples (green line, control; red line, *VillinCre* mutant; blue line, *Sox2Cre* mutant; symbol, mean; vertical line,  $\pm$  SEM;  $n \geq 10$  for all genotypes).





**Table S1. Recovery of correct Mendelian ratios of all possible genotypes at E18.5 and P0**

| Parameter                | Prdm1 <sup>CA/+</sup> | Villin Cre <sup>+/-</sup> , Prdm1 <sup>CA/+</sup> | Prdm1 <sup>CA/BEH</sup> | Villin Cre, Prdm1 <sup>CA/BEH</sup> |
|--------------------------|-----------------------|---------------------------------------------------|-------------------------|-------------------------------------|
| Prdm1 dosage             | +/+                   | +/-                                               | +/-                     | -/-                                 |
| E18.5 (n = 112)          |                       |                                                   |                         |                                     |
| Expected (E)             | 28                    | 28                                                | 28                      | 28                                  |
| Observed (O)             | 30                    | 29                                                | 28                      | 25                                  |
| O - E                    | 2                     | 1                                                 | 0                       | -3                                  |
| (O - E) <sup>2</sup>     | 4                     | 1                                                 | 0                       | 9                                   |
| (O - E) <sup>2</sup> / E | 0.142857143           | 0.035714286                                       | 0                       | 0.321428571                         |
| P0 (n = 179)             |                       |                                                   |                         |                                     |
| Expected (E)             | 44.75                 | 44.75                                             | 44.75                   | 44.75                               |
| Observed (O)             | 45                    | 49                                                | 44                      | 41                                  |
| O - E                    | 0.25                  | 4.25                                              | -0.75                   | -3.75                               |
| (O - E) <sup>2</sup>     | 0.0625                | 18.0625                                           | 0.5625                  | 14.0625                             |
| (O - E) <sup>2</sup> / E | 0.001396648           | 0.403631285                                       | 0.0125698               | 0.31424581                          |

For E18.5,  $\chi^2 = 0.5$ ,  $P = \text{NS}$ . For P0,  $\chi^2 = 0.731844$ ,  $P = \text{NS}$ . The expected genotypes were recovered at correct Mendelian ratios from Villin-Cre, Prdm1BEH/+, Prdm1CA/CA matings at E18.5 and P0.  $\chi^2$  test with 3 degrees of freedom.

**Table S2. Partial list of misregulated transcripts identified in E18.5 Blimp1 mutant intestines**

| Function gene             | Chr | Gene name                                                             | Fold change (array) | Mean fold change (qPCR) | Predicted Blimp-1 BS |
|---------------------------|-----|-----------------------------------------------------------------------|---------------------|-------------------------|----------------------|
| <b>Up-regulated</b>       |     |                                                                       |                     |                         |                      |
| <b>Metabolism</b>         |     |                                                                       |                     |                         |                      |
| Arg2                      | 12  | Arginase-2                                                            | 282.08              | 39                      | 1                    |
| 2010204N08Rik             | 3   | Sucrase Isomaltase                                                    | 128.83              | 118                     | 5                    |
| Cyp4v3                    | 8   | Cytochrome P450, family 4, subfamily v, polypeptide 3                 | 27.67               | 25.57                   | 0                    |
| Reg3a                     | 6   | Regenerating Islet derived-3A                                         | 13.29               |                         |                      |
| Gsta1                     | 9   | GST-1                                                                 | 11.71               | 2.86                    | 1                    |
| Gsta4                     | 9   | GST-4                                                                 | 7.47                | 6.79                    | 3                    |
| Gsta2                     | 9   | GST-2                                                                 | 5.44                | 2.49                    | 0                    |
| Reg1                      | 6   | Regenerating Islet derived-1                                          | 5.09                | 7.7                     | 3                    |
| Cyp2d26                   | 15  | Cytochrome P450, family 2, subfamily d, polypeptide 26                | 5.06                |                         | 1                    |
| Reg3b                     | 6   | Regenerating Islet derived-3B                                         | 4.96                |                         | 1                    |
| Treh                      | 9   | Trehalase                                                             | 4.79                | 3.4                     | 0                    |
| Aldh1a1                   | 19  | Aldehyde dehydrogenase 1 family, member A1                            | 4.67                |                         | 3                    |
| Dpep1                     | 8   | Dipeptidase-1                                                         | 3.63                |                         | 2                    |
| <b>Molecule transport</b> |     |                                                                       |                     |                         |                      |
| Aqp3                      | 4   | Aquaporin-3                                                           | 16.29               | 4.66                    | 0                    |
| Slc16a5                   | 11  | Solute carrier family 16 (monocarboxylic acid transporters), member 5 | 16.07               |                         | 2                    |
| Slc5a8                    | 10  | solute carrier family 5 (iodide transporter), member 8                | 5.14                |                         |                      |
| Slc46a1                   | 11  | Solute carrier family 46 (folate transporter), member 1               | 3.59                |                         | 0                    |
| <b>Cell adhesion/ECM</b>  |     |                                                                       |                     |                         |                      |
| Myo18b                    | 5   | Myosin 18B                                                            | 16.5                |                         |                      |
| Krt20                     | 11  | Keratin 20                                                            | 2.7                 |                         | 0                    |
| Gal3st2                   | 1   | Galactose-3-O-sulfotransferase 2                                      | 2.49                |                         | 3                    |
| Myo1a                     | 10  | Myosin IA                                                             | 2.24                | 4                       | 0                    |
| <b>Unknown</b>            |     |                                                                       |                     |                         |                      |
| 1810065E05RIK             | 11  | RIKEN cDNA 1810065E05 gene                                            | 118.16              | 24.35                   | 5                    |
| 2210407C18RIK             | 11  | RIKEN cDNA 2210407C18 gene                                            | 15.69               | 67.21                   | 6                    |
| <b>Down-regulated</b>     |     |                                                                       |                     |                         |                      |
| <b>Metabolism</b>         |     |                                                                       |                     |                         |                      |
| Afp                       | 5   | $\alpha$ -Fetoprotein                                                 | 29.3                | 27.7                    | 2                    |
| Ttr                       | 18  | Transthyretin                                                         | 6.27                | 2.99                    | 1                    |
| Pgam2                     | 11  | Phosphoglycerate mutase 2                                             | 5.96                |                         | 1                    |
| Trf                       | 9   | Transferrin                                                           | 4.71                |                         | 1                    |
| Gusb                      | 5   | Glucuronidase, $\beta$                                                | 3.82                | 8.5                     | 1                    |
| Naga                      | 15  | <i>N</i> -acetyl galactosaminidase, $\alpha$                          | 2.88                | 7.2                     | 4                    |
| Asl                       | 5   | Arginosuccinate lyase                                                 | 2.51                |                         | 1                    |
| Ass1                      | 2   | Argininosuccinate synthetase 1                                        | 2.42                | 3.6                     | 4                    |
| Neu1                      | 17  | Neuraminidase 1                                                       | 1.85                | 4.3                     | 0                    |
| Glb1                      | 9   | Galactosidase, $\beta$                                                | 1.7                 | 2.6                     | 1                    |
| <b>Cell adhesion/ECM</b>  |     |                                                                       |                     |                         |                      |
| Fndc5                     | 4   | Fibronectin type III domain containing 5                              | 9.06                |                         | 2                    |
| Lrrn1                     | 6   | Leucine rich repeat protein 1, neuronal                               | 5.18                |                         | 1                    |
| Krt23                     | 11  | Keratin 23                                                            | 4.77                |                         | 3                    |

Fold change differences ( $P < 0.05$ ) observed in Illumina microarray analysis were validated by qPCR analysis where indicated. Blimp1 binding site (BS) predictions are based on algorithms from Genomatix software. Chr, chromosome.



**Table S3. Primer and probe set used for qPCR**

| Gene name              | Primer pair sequence                              | Universal probe library probe no. |
|------------------------|---------------------------------------------------|-----------------------------------|
| <i>Hes1</i>            | TGCCAGCTGATATAATGGAGAA<br>CCATGATAGGCTTTGATGACTTT | 83                                |
| <i>c-myc</i>           | CCTAGTGCTGCATGAGGAGA<br>TCCACAGACACCATCAATTT      | 77                                |
| <i>Klf4</i>            | GGACTCCGGAGGACCTTCT<br>GAGAAGGACGGGAGCAGAG        | 83                                |
| <i>Actin</i>           | AAGGCCAACCCTGAAAAGAT<br>GTGGTACGACCAGAGGCATAC     | 56                                |
| <i>Prdm1 (Exon4-5)</i> | AGTCCCAAGAATGCCAACA<br>TTTCTCCTCATTAAAGCCATCAA    | 31                                |
| <i>Math1</i>           | TGCGATCTCCGAGTGAGAG<br>CTCTTCTGCAAGGTCTGATTTTT    | 69                                |
| <i>Sis</i>             | GGTGAGCAGTGCAACAAAGA<br>CAGGACATTCAACACCATTTGA    | 16                                |
| <i>Gsta1</i>           | CCGGAAGATTTGGAAAAGC<br>TTTGGTGGCGATGTAGTTGA       | 21                                |
| <i>Cyp4v3</i>          | TGGCTGGGACTAGGACTTCTT<br>TGGAAAGTGGGCCTTAGC       | 69                                |
| <i>Gsta4</i>           | CCAGCTCCTAGAAGCCATTTT<br>GGAATGTTGCTGATTCTTGTCTT  | 31                                |
| <i>Gsta2</i>           | CAGAGTCCGGAAGATTTGGA<br>AGAATGGCTCTGGTCTGCAC      | 22                                |
| <i>Reg1</i>            | TGGCTAGGAACGCCTACTTC<br>CTTCTGGGCAACTGATCCTG      | 108                               |
| <i>Aqp3</i>            | GGCTGGGGCTCAGAAGTC<br>GAAGACACCAGCGATGGAAC        | 77                                |
| <i>1810065E05RIK</i>   | AATCAAGTGGACACGAAACCA<br>TGCACTTCAGAGGAGTTGGA     | 16                                |
| <i>Ttr</i>             | GACTGGTATTTGTGTCTGAAGCTG<br>TTACAGCCACGTCTACAGCAG | 56                                |
| <i>Afp</i>             | AGTGCGTGACGGAGAAGAA<br>AGCCAACACATCGCTAGTCA       | 69                                |
| <i>Myo1A</i>           | CGTGATCAACTACTGCAATGAGA<br>TCCACCTTTGTCCACGGTAT   | 62                                |
| <i>Treh</i>            | GCTGGGGCTGGGACTTAG<br>TCTCCATGGCAGTAGATCTGG       | 77                                |
| <i>Glb1</i>            | TGCTCTTCGAGAAGTCATTGAG<br>TGGGTGTAGACGGAGGGATA    | 95                                |
| <i>Neu1</i>            | GACCTGGCTCAGGCATTC<br>GGCACCGTGGTCATCACT          | 94                                |
| <i>Naga</i>            | TGCCTTCTAGCTGACTATGC<br>GTCATTTTGCCCATGTCCCTC     | 105                               |
| <i>GusB</i>            | CAGGGTCAACTCAGGTGCC<br>CAGTTGTTGTACCTTCCCTC       | 49                                |
| <i>Arg2</i>            | TATGGTCCAGCTGCCATTC<br>CCAAAGTCTTTAGGTGGCATC      | 80                                |
| <i>Ass1</i>            | TGGCCAGGAAAGCAGACTAC<br>ACGAGGATGCAGGAGGTGT       | 49                                |
